# Supplementary material for: Self-assembly between 1,4-diazabicyclo[2.2.2]octane and bis(hexafluoroalcohols): solid/liquid phase switching for catalyst recycling
Source: Royal Society of Chemistry journal article supplement (doi:10.1039/c2cy00528j), 2012-01-01
Supplement: c2cy00528j.pdf [file c2cy00528j.pdf]

## Self-assembly between 1,4-diazabicyclo[2.2.2]octane and bis(hexafluoroalcohols): solid/liquid phase switching for catalyst recycling

Julien Legros,<sup>a,b\*</sup> Benoit Crousse,<sup>a</sup> Danièle Bonnet-Delpon<sup>a</sup> and Alexandra M. Z. Slawin<sup>c</sup>

<sup>a</sup> Laboratoire BioCIS, Faculté de Pharmacie, Univ. Paris Sud and CNRS,  
5, rue Jean-Baptiste Clément, F-92296 Châtenay-Malabry (France)

<sup>b</sup> *New adress*: Institut de Recherche en Chimie Organique Fine, CNRS/Univ. Rouen/INSA  
Rouen, F-76130 Mont-Saint-Aignan

<sup>c</sup> Molecular Structure Laboratory, School of Chemistry, University of St. Andrews, St.  
Andrews, Fife, KY16 9ST, United Kingdom

*julien.legros@univ-rouen.fr*

### Supporting information

---

#### Table of contents

|                                                                                                                                                       |     |
|-------------------------------------------------------------------------------------------------------------------------------------------------------|-----|
| General methods and materials                                                                                                                         | S2  |
| Synthesis of <b>1a</b> and <b>1b</b>                                                                                                                  | S3  |
| General procedure for the Morita-Baylis-Hillman reaction catalysed by <b>1a</b> or <b>1b</b>                                                          | S4  |
| Characterization of <b>2-7</b>                                                                                                                        | S4  |
| Synthesis of 7-methoxy-2,3,4,4a-tetrahydro-xanthen-1-one ( <b>8</b> )                                                                                 | S7  |
| Typical procedure for the cyanosilylation of ketones catalysed by <b>1a</b> : synthesis of 2-methyl-2-(trimethylsilyloxy)-heptanenitrile ( <b>9</b> ) | S8  |
| Characterization of 2-phenyl-2-(trimethylsilyloxy)-propionitrile ( <b>10</b> )                                                                        | S8  |
| NMR spectra of <b>1a-b</b> and <b>8</b>                                                                                                               | S9  |
| X-ray diffraction data for <b>1a</b>                                                                                                                  | S12 |
| X-ray diffraction data for <b>1b</b>                                                                                                                  | S27 |

## General methods and materials

**General methods:**  $^1\text{H}$ ,  $^{13}\text{C}$  and  $^{19}\text{F}$  NMR spectra were obtained on Bruker 200 and 300 spectrometers. In all measurements  $\text{CDCl}_3$  was used as solvent, except where indicated. Chemical shifts ( $\delta$ ) are given in ppm relative to TMS, as internal standard for  $^1\text{H}$  and  $^{13}\text{C}$  NMR, and relative to  $\text{CFCl}_3$  for  $^{19}\text{F}$  NMR. Coupling constants  $J$  are measured in Hz.

IR spectra have been recorded on a FT Bruker Vector 22 spectrometer.

APCI MS spectra have been obtained on an Esquire-LC Bruker spectrometer.

**Materials:** All chemicals were used as provided without further purification, except benzaldehyde that was purified by washing with aq. sol.  $\text{NaHCO}_3$ .

NMR spectra of compounds **2-10** match with those reported in the literature. References are given for each compound.

**Crystal structure analyses:** X-ray crystal structures were determined with  $\text{Cu-K}\alpha$  radiation ( $\lambda = 1.54178 \text{ \AA}$ ) at 173 K using a Rigaku Saturn CCD with a Rigaku MM007 RA and confocal optics. The data was corrected for Lorentz, polarisation and absorption. The data for the complexes analysed was collected and processed using CrystalClear (Rigaku).<sup>1</sup> The structures were solved by direct methods and expanded using Fourier techniques. The non-hydrogen atoms were refined anisotropically. Hydrogen atoms were refined using the riding model. All calculations were performed using the CrystalStructure<sup>2</sup> crystallographic software package except for refinement, which was performed using SHELXL-97.<sup>3</sup>

These X-ray data can be obtained free of charge via [www.ccdc.cam.ac.uk/conts/retrieving.html](http://www.ccdc.cam.ac.uk/conts/retrieving.html) CCDC 855431, 855432 or from the Cambridge Crystallographic Data Centre, 12 Union Road, Cambridge CB2 1EZ, UK; Fax: +44 1223-336-033; E-mail: [deposit@ccdc.cam.ac.uk](mailto:deposit@ccdc.cam.ac.uk).

---

1 (a) CrystalClear 2.0: Rigaku Corporation, 2004; (b) J. W. P. Flugrath, *Acta Cryst.*, **1999**, *D55*, 1718.

2 CrystalStructure 4.0: Crystal Structure Analysis Package, Rigaku and Rigaku/MS (2000-2009). 9009 New Trails Dr. The Woodlands TX 77381 USA.

3 G.M. Sheldrick, *Acta Cryst. A*, **2008**, *64*, 112.

## Synthesis of 1a and 1b

### 1,3-Bis-HFAB/DABCO adduct (1a)

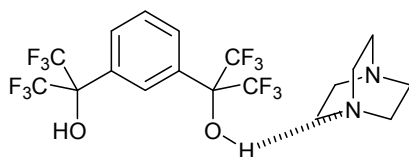

A solution of 1,4-diazabicyclo[2.2.2]octane (6 mmol, 672 mg) in dichloromethane (20 mL) was added dropwise to a solution of 1,3-bis-HFAB (6 mmol, 2.46 g) in dichloromethane (20 mL) at room temperature. A solid was immediately formed, which was filtered and then crystallized from toluene (90 mL) to afford **1a** (2.86 g, 91% yield).

White crystals, mp 208-210 °C

$^{19}\text{F}$  NMR (acetone- $d_6$ , 188 MHz)  $\delta = -70.7$  (s)

$^1\text{H}$  NMR (acetone- $d_6$ , 300 MHz)  $\delta = 2.72$  (s, 12H), 7.70 (t,  $J = 8.0$ , 1H), 7.93 (d,  $J = 8.1$ , 2 H), 8.29 (s, 1H), OH n.o.

$^{13}\text{C}$  NMR (acetone- $d_6$ , 75 MHz)  $\delta = 48.2$ , 79.1 (sept,  $^2J_{\text{C-F}} = 29$ ), 125.0 (q,  $^1J_{\text{C-F}} = 288$ ), 127.8, 130.5, 130.8, 133.9.

Anal. Calcd for  $\text{C}_{18}\text{H}_{18}\text{F}_{12}\text{N}_2\text{O}_2$  (522.33): C, 41.39; H, 3.47; N, 5.36. Found: C, 41.43; H, 3.64; N, 5.27.

### 1,4-Bis-HFAB/DABCO adduct (1b)

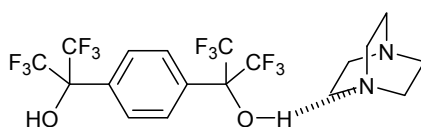

A solution of 1,4-diazabicyclo[2.2.2]octane (6 mmol, 672 mg) in dichloromethane (20 mL) was added dropwise to a solution of 1,4-bis-HFAB (6 mmol, 2.46 g) in warm dichloromethane (60 mL). A solid was immediately formed, which was filtered and then crystallized from toluene (150 mL) to afford **1b** (2.80 g, 89% yield).

White crystals, mp 240 °C

$^{19}\text{F}$  NMR (acetone- $d_6$ , 188 MHz)  $\delta = -70.7$  (s)

$^1\text{H}$  NMR (acetone- $d_6$ , 200 MHz)  $\delta = 2.71$  (s, 12H), 7.94 (s, 4H), OH n.o.

$^{13}\text{C}$  NMR (acetone- $d_6$ , 75 MHz)  $\delta = 48.2$ , 79.1 (sept,  $^2J_{\text{C-F}} = 30$ ), 125.1 (q,  $^1J_{\text{C-F}} = 287$ ), 129.2, 135.3

Anal. Calcd for  $\text{C}_{18}\text{H}_{18}\text{F}_{12}\text{N}_2\text{O}_2$  (522.33): C, 41.39; H, 3.47; N, 5.36. Found: C, 41.47; H, 3.41; N, 5.33.

## General procedure for the Morita-Baylis-Hillman reaction catalyzed by **1a** or **1b**

A 10 mL round-bottomed flask was charged with the aromatic aldehyde (3 mmol), methanol (12 mmol, 384 mg), methyl acrylate (6 mmol, 516 mg) and catalyst **1** (0.6 mmol, 314 mg). The flask was then capped and the reaction mixture was stirred at 20 °C for the time indicated in Table 1. After completion of the reaction (<sup>1</sup>H NMR monitoring), volatiles were evaporated in vacuo, and dichloromethane (2 mL) was added to precipitate **1**. The solution was filtered, and the filtrate was concentrated to afford the Morita-Baylis-Hillman products **2-7** (if necessary the product was purified by column chromatography; eluent cyclohexane/AcOEt, 60:40). The recovered solid **1** was washed again with dichloromethane (2 mL) and ready to be reused.

### Methyl 3-hydroxy-2-methylene-3-(4-nitrophenyl)propanoate (**2**)<sup>4</sup>

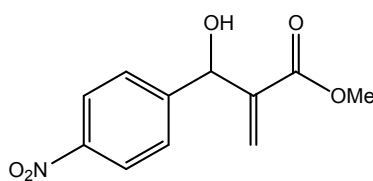

97% yield (1<sup>st</sup> run)

<sup>1</sup>H NMR (300 MHz)  $\delta$  = 3.51 (d,  $J$  = 5.9, 1H), 3.78 (s, 3H), 5.68(d,  $J$  = 5.6, 1H), 5.94(d,  $J$  = 1.2, 1H), 6.44 (d,  $J$  = 1.1, 1H), 7.57 (d,  $J$  = 8.5, 2H), 8.35 (d,  $J$  = 8.7, 2H).

<sup>13</sup>C NMR (75 MHz)  $\delta$  = 52.2, 72.5, 123.5, 127.2, 127.3, 140.9, 147.3, 148.6, 166.6.

IR (v, cm<sup>-1</sup>): 1517, 1712, 3464.

### Methyl 3-hydroxy-2-methylene-3-(3-nitrophenyl)propanoate (**3**)<sup>5</sup>

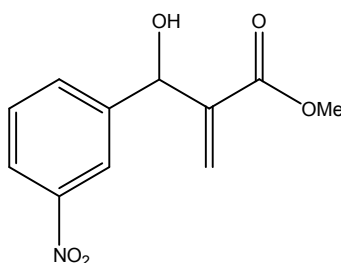

85% yield

4 J. Cai, Z. Zhou, G. Zhao, C. Tang, *Org. Lett.* **2002**, *4*, 4723.

5 X. Mi, S. Luo, J.-P. Cheng, *J. Org. Chem.* **2005**, *70*, 2338.

$^1\text{H}$  NMR (300 MHz)  $\delta$  = 3.26 (d,  $J$  = 6.3, 1 H), 3.75 (s, 3 H), 5.64 (d,  $J$  = 6.2, 1H), 5.90 (d,  $J$  = 1.2, 1 H), 6.42 (d,  $J$  = 1.3, 1 H), 7.53 (dd,  $J$  = 8.2, 7.9, 1 H), 7.75 (d,  $J$  = 7.7, 1 H), 8.16 (d,  $J$  = 8.2, 1 H), 8.26 (s, 1H)

$^{13}\text{C}$  NMR (75 MHz)  $\delta$  = 52.2, 72.6, 121.5, 122.7, 127.2, 129.3, 132.6, 140.8, 143.5, 148.3, 166.3.

IR (v,  $\text{cm}^{-1}$ ): 1526, 1713, 3452

#### Methyl 3-hydroxy-3-(2,4-dichlorophenyl)-2-methylenepropanoate (4)<sup>4</sup>

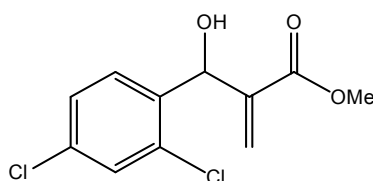

80% yield

$^1\text{H}$  NMR (300 MHz)  $\delta$  = 3.27 (d,  $J$  = 4.8, 1H), 3.79 (s, 3H), 5.58 (d,  $J$  = 1.2, 1H), 5.92 (d,  $J$  = 4.6, 1H), 6.34 (d,  $J$  = 1.3, 1H), 7.29 (dd,  $J$  = 8.4, 2.1, 1H), 7.38 (d,  $J$  = 2.0, 1H), 7.52 (d,  $J$  = 8.4, 1H).

$^{13}\text{C}$  NMR (75 MHz)  $\delta$  = 52.1, 68.9, 127.0, 127.1, 129.1, 133.4, 134.1, 136.9, 140.2, 166.8.

IR (v,  $\text{cm}^{-1}$ ): 1714, 3429.

#### Methyl 3-hydroxy-3-(4-chloro-3-nitrophenyl)-2-methylenepropanoate (5)<sup>6</sup>

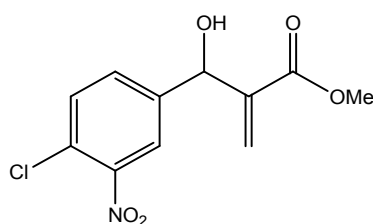

$^1\text{H}$  NMR (300 MHz)  $\delta$  = 3.76 (s, 3H), 5.58 (d,  $J$  = 1.2, 1H), 5.56 (s,  $J$  = 4.6, 1H), 5.91 (s,  $J$  = 1.3, 1H), 6.41 (s, 1H), 7.50-7.56 (m,  $J$  = 2.0, 2H), 7.88-7.92 (m, 1H).

$^{13}\text{C}$  NMR (75 MHz)  $\delta$  = 51.8, 70.9, 123.5, 125.4, 126.7, 131.3, 131.4, 140.7, 142.2, 147.2, 165.9.

IR (v,  $\text{cm}^{-1}$ ): 1704, 3452

6 S.-H. Zhao, H.-R. Zhang, L.-H. Feng, Z.-B. Chen, *J. Mol. Catal. A* **2006**, 258, 251.

### Methyl 3-hydroxy-3-(2,4-dinitrophenyl)-2-methylenepropanoate (6)<sup>7</sup>

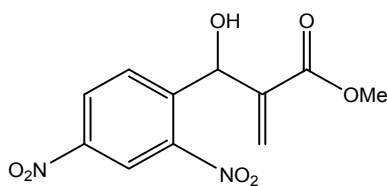

<sup>1</sup>H NMR (300 MHz)  $\delta$  = 3.75 (s, 3H), 5.75 (s, 1H), 6.29 (s, 1H), 6.39 (s, 1H), 8.04 (d,  $J$  = 8.7, 1H), 8.47 (dd,  $J$  = 8.3, 2.7, 1H), 8.78 (d,  $J$  = 2.3, 1H).

<sup>13</sup>C NMR (75 MHz)  $\delta$  = 52.1, 66.6, 119.7, 126.7, 127.0, 130.6, 140.5, 143.3, 146.9, 147.8, 165.7.

IR (v, cm<sup>-1</sup>): 1526, 1708, 3547.

### Methyl 3-hydroxy-2-methylene-3-phenylpropanoate (7)<sup>8</sup>

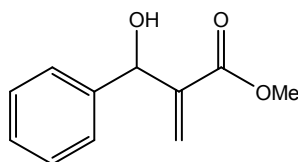

77% yield

<sup>1</sup>H NMR (300 MHz)  $\delta$  = 3.58 (br s, 1H), 3.71 (s, 3H), 5.56 (s, 1H), 5.84 (s, 1H), 6.34 (s, 1H), 7.27-7.40 (m, 5H).

<sup>13</sup>C NMR (75 MHz)  $\delta$  = 51.7, 72.7, 125.6, 126.5, 127.6, 128.2, 141.3, 142.0, 166.6.

IR (v, cm<sup>-1</sup>): 1717, 3445.

<sup>7</sup> O. B. Familoni, P. J. Klaas, K. A. Lobb, V. E. Pakade, P. T. Kaye, *Org. Biomol. Chem.* **2006**, *4*, 3960.

<sup>8</sup> D. Basavaiah, K. R. Reddy, N. Kumaragurubaran, *Nat. Protoc.* **2007**, *2*, 2665.

## Synthesis of 7-methoxy-2,3,4,4a-tetrahydro-xanthen-1-one (8)<sup>9</sup>

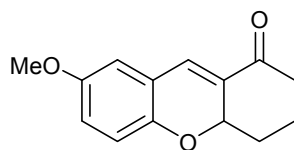

A sealed tube was charged with a solution of 5-methoxysalicylaldehyde (1 mmol, 152 mg) and 2-cyclohexen-1-one (2 mmol, 192 mg) in dioxane (1 mL). **1a** (522 mg) was then added and the mixture was heated to 95 °C under vigorous stirring. After 48 h, the reaction mixture was cooled to room temperature and **1a** crystallized. **1a** was then filtered off, washed with dioxane (2×2 mL) and recovered as white crystals (480 mg, 92%). Solvent was evaporated from the filtrate in vacuo, and the residue was purified by flash chromatography (cyclohexane/AcOEt, 85:15) to afford the product **3** as a yellow solid (189 mg, 82%).

mp 103-105 °C

<sup>1</sup>H NMR (300 MHz)  $\delta$  = 1.60-1.75 (m, 1 H), 1.93-2.14 (m, 2H), 2.31-2.49 (m, 2H) 2.52-2.64 (m, 1H), 3.78 (s, 3H), 4.93 (ddd,  $J$  = 2.2, 6.1, 10.4, 1H), 6.74 (t,  $J$  = 1.7, 1H), 6.80 (d,  $J$  = 1.6, 1H), 7.40 (d,  $J$  = 2.2, 1H).

<sup>13</sup>C NMR (75 MHz)  $\delta$  = 17.9, 29.6, 38.8, 55.7, 74.6, 113.4, 116.7, 118.2, 122.6, 131.0, 131.5, 149.9, 154.5, 197.3.

IR  $\nu$  (cm<sup>-1</sup>) 1674, 2936

APCI  $m/z$  (rel. int.): 231 [M+H]<sup>+</sup> (100)

---

9 B. Lesch, S. Bräse, *Angew. Chem. Int. Ed.* **2004**, *43*, 115.

### Typical procedure for the cyanosilylation of ketones catalysed by **1a**: synthesis of 2-methyl-2-(trimethylsilyloxy)-heptanenitrile (**9**)<sup>10</sup>

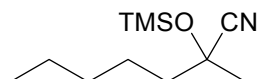

To a mixture of heptan-2-one (1 mmol, 114 mg) and trimethylsilyl cyanide (1.05 mmol, 104 mg) in a 10 mL round-bottomed flask under stirring, catalyst **1a** (0.2 mmol, 105 mg) was added and quickly solubilised. After 4.5 h (<sup>1</sup>H NMR monitoring), the mixture was heated to 60 °C under vacuum in a rotavapor until a precipitate appears (2-3 h). Dichloromethane was then added to the mixture and filtered. The solid **1a** was recovered (74 mg), and solvents from the filtrate were evaporated in vacuo. The residue was filtered over a short pad of silica with cyclohexane to afford pure silylated cyanohydrin **4a** (196 mg, 92%).

<sup>1</sup>H NMR (300 MHz)  $\delta$  = 0.23 (s, 9H), 0.90 (t,  $J$  = 6.8, 1H), 1.26-1.38 (m, 4H), 1.38-1.6 (m, 2H), 1.56 (s, 3H), 1.62-1.78 (m, 2H).

<sup>13</sup>C NMR (75 MHz)  $\delta$  = 1.3, 13.9, 22.4, 23.9, 28.9, 31.4, 43.3, 69.6, 122.2.

### 2-Phenyl-2-(trimethylsilyloxy)-propionitrile (**10**)<sup>11</sup>

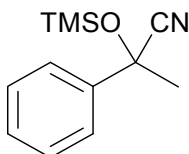

86% yield

<sup>1</sup>H NMR (300 MHz)  $\delta$  = 0.18 (s, 9H), 1.86 (s, 3H), 7.34-7.42 (m, 3H), 7.52-7.57 (m, 2H).

<sup>13</sup>C NMR (75 MHz)  $\delta$  = 1.0, 33.6, 71.6, 121.6, 124.6, 128.6, 142.0.

10 T. Sigeru, I. Tsutomu, T. Sadahito, H. Hirofumi, K. Hideki, U. Kenji, *Bull. Chem. Soc. Jpn.* **1987**, *60*, 2173.

11 N. Kurono, M. Yamaguchi, K. Suzuki, T. Ohkuma, *J. Org. Chem.* **2005**, *70*, 6530.



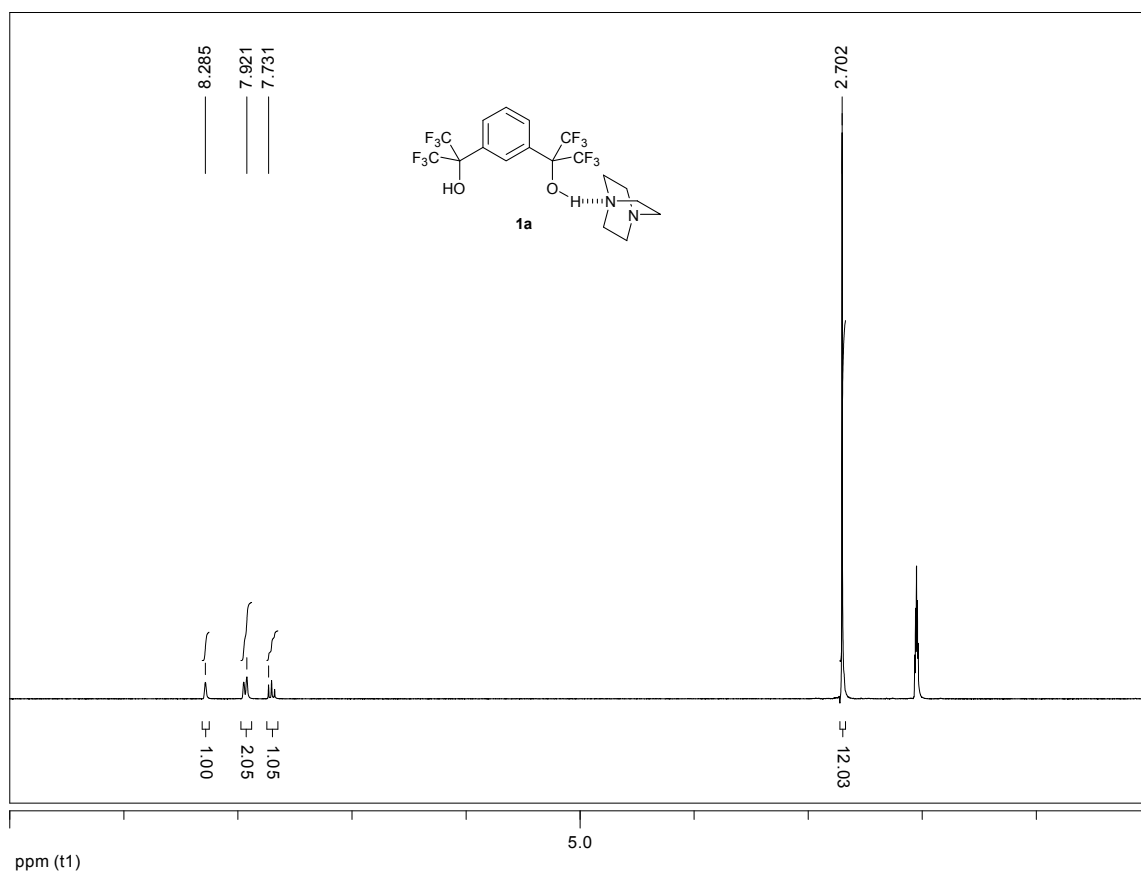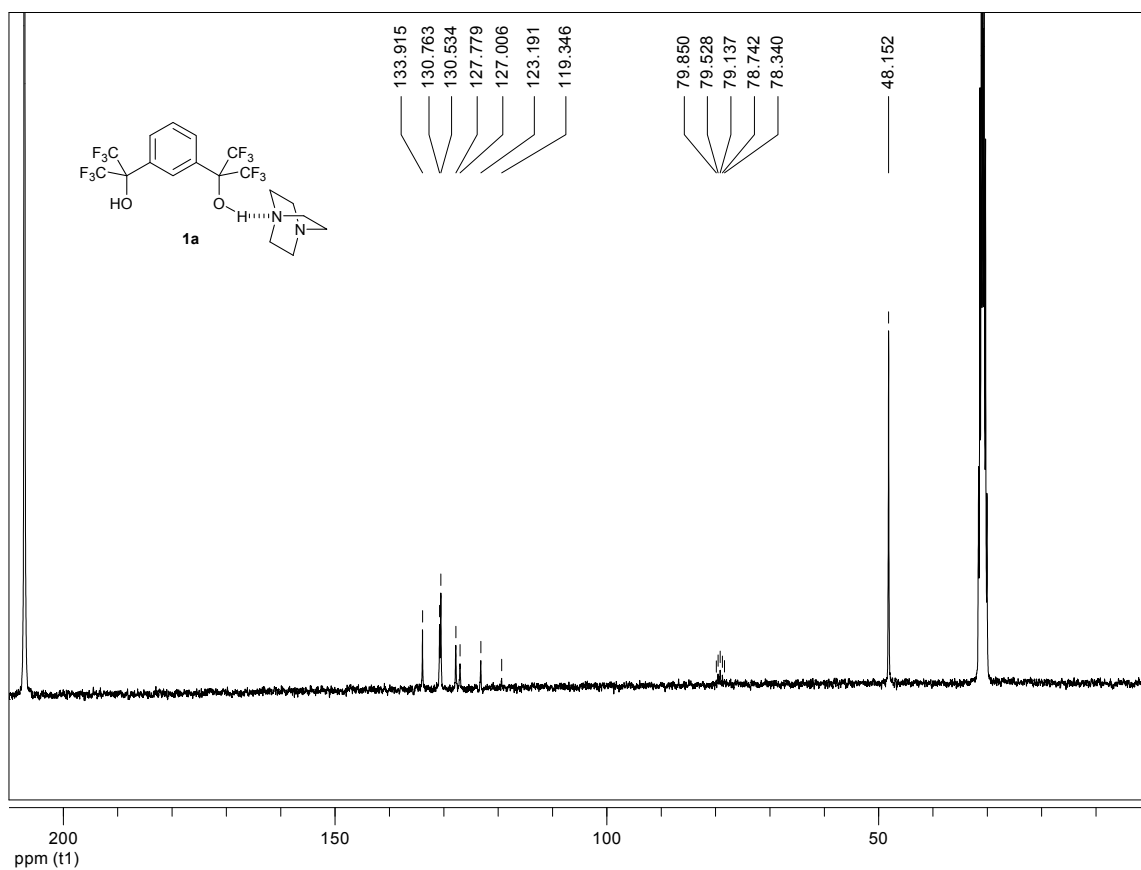

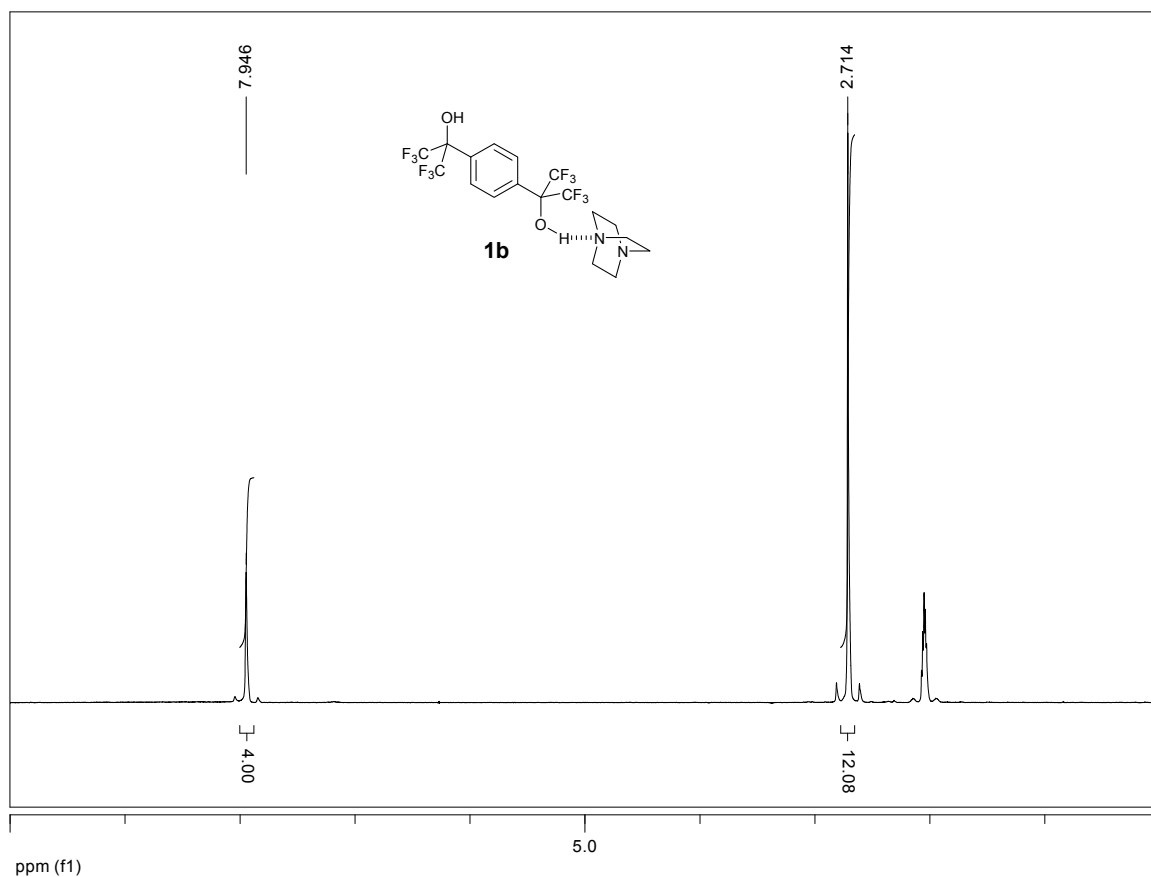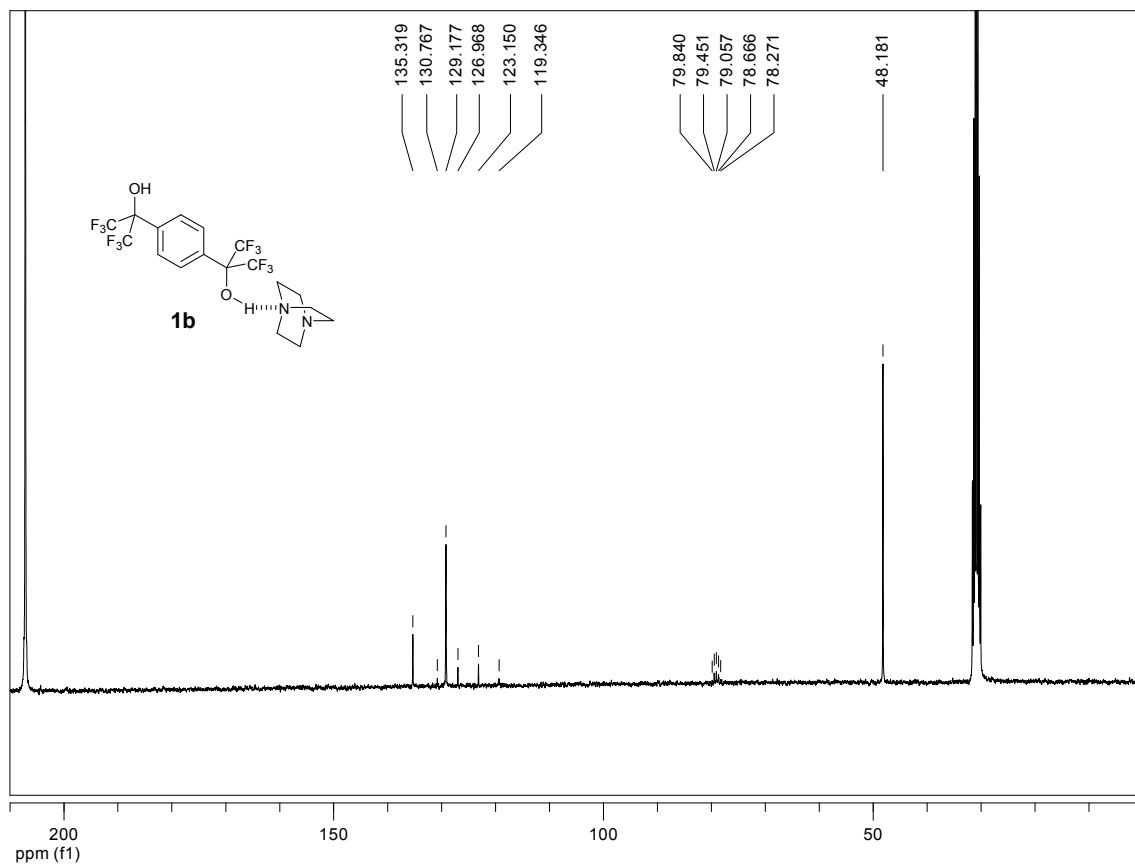

### 7-methoxy-2,3,4,4a-tetrahydro-xanthen-1-one (8)

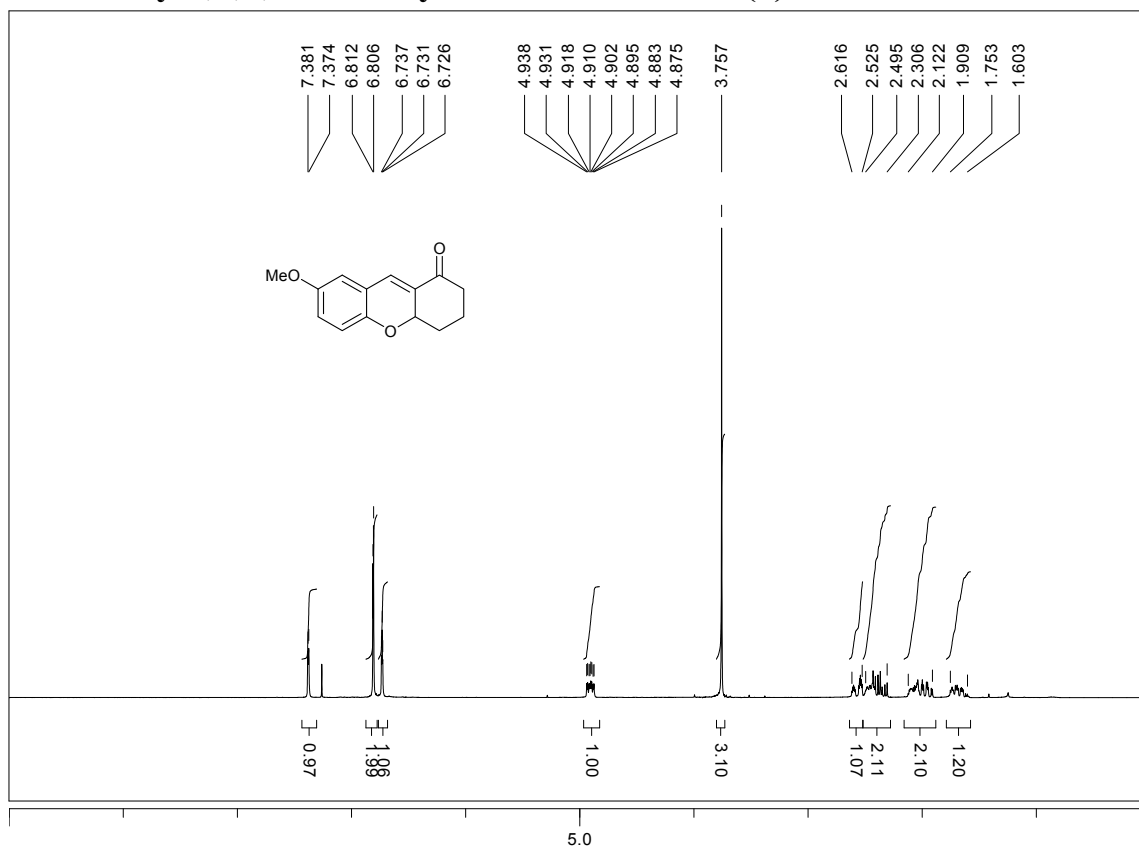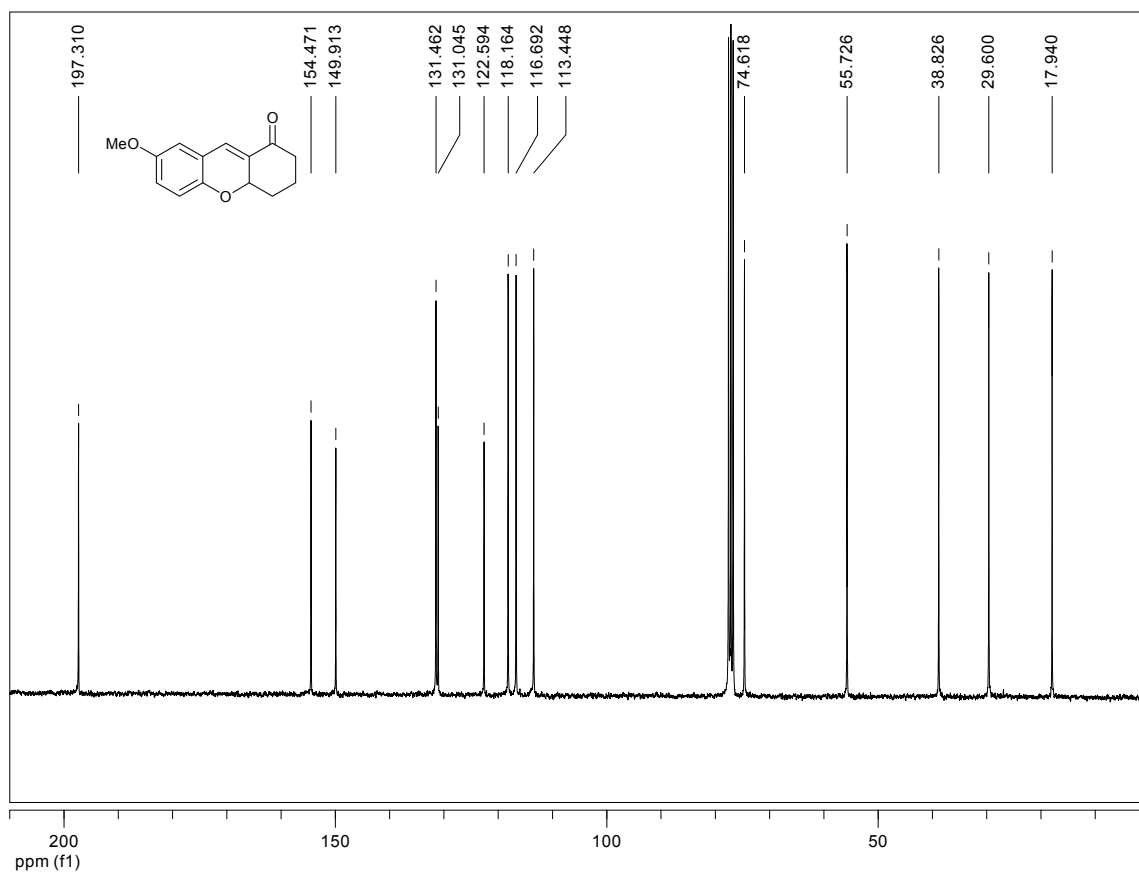

## X-ray diffraction data for 1a

Table 1. Crystal data and structure refinement for 1a.

|                                   |                                                                               |                  |
|-----------------------------------|-------------------------------------------------------------------------------|------------------|
| Identification code               | 1a                                                                            |                  |
| Empirical formula                 | C <sub>18</sub> H <sub>18</sub> F <sub>12</sub> N <sub>2</sub> O <sub>2</sub> |                  |
| Formula weight                    | 522.34                                                                        |                  |
| Temperature                       | 173(2) K                                                                      |                  |
| Wavelength                        | 1.54178 Å                                                                     |                  |
| Crystal system                    | Triclinic                                                                     |                  |
| Space group                       | P-1                                                                           |                  |
| Unit cell dimensions              | a = 8.301(3) Å                                                                | α = 80.225(12)°. |
|                                   | b = 10.979(4) Å                                                               | β = 85.04(3)°.   |
|                                   | c = 11.710(3) Å                                                               | γ = 89.69(2)°.   |
| Volume                            | 1047.7(6) Å <sup>3</sup>                                                      |                  |
| Z                                 | 2                                                                             |                  |
| Density (calculated)              | 1.656 Mg/m <sup>3</sup>                                                       |                  |
| Absorption coefficient            | 1.634 mm <sup>-1</sup>                                                        |                  |
| F(000)                            | 528                                                                           |                  |
| Crystal size                      | 0.20 x 0.10 x 0.01 mm <sup>3</sup>                                            |                  |
| Theta range for data collection   | 3.84 to 68.17°.                                                               |                  |
| Index ranges                      | -9 ≤ h ≤ 9, -13 ≤ k ≤ 12, -13 ≤ l ≤ 13                                        |                  |
| Reflections collected             | 14359                                                                         |                  |
| Independent reflections           | 3590 [R(int) = 0.0513]                                                        |                  |
| Completeness to theta = 67.00°    | 94.8 %                                                                        |                  |
| Absorption correction             | Multiscan                                                                     |                  |
| Max. and min. transmission        | 1.000 and 0.763                                                               |                  |
| Refinement method                 | Full-matrix least-squares on F <sup>2</sup>                                   |                  |
| Data / restraints / parameters    | 3590 / 2 / 315                                                                |                  |
| Goodness-of-fit on F <sup>2</sup> | 1.088                                                                         |                  |
| Final R indices [I > 2σ(I)]       | R1 = 0.0590, wR2 = 0.1634                                                     |                  |
| R indices (all data)              | R1 = 0.0700, wR2 = 0.1770                                                     |                  |
| Largest diff. peak and hole       | 0.509 and -0.387 e.Å <sup>-3</sup>                                            |                  |

Table 2. Atomic coordinates ( $\times 10^4$ ) and equivalent isotropic displacement parameters ( $\text{\AA}^2 \times 10^3$ ) for 1a.  $U(\text{eq})$  is defined as one third of the trace of the orthogonalized  $U^{ij}$  tensor.

|       | x        | y       | z       | U(eq)  |
|-------|----------|---------|---------|--------|
| N(1)  | 4795(3)  | 7204(2) | 8268(2) | 32(1)  |
| C(2)  | 5394(5)  | 8135(5) | 7275(3) | 84(2)  |
| C(3)  | 4357(5)  | 8138(5) | 6237(3) | 77(1)  |
| N(4)  | 3069(3)  | 7205(2) | 6539(2) | 33(1)  |
| C(5)  | 3128(4)  | 7535(5) | 8567(3) | 76(1)  |
| C(6)  | 2076(4)  | 7512(5) | 7546(3) | 63(1)  |
| C(7)  | 4808(8)  | 6014(4) | 7914(5) | 103(2) |
| C(8)  | 3778(6)  | 5999(4) | 6872(4) | 83(2)  |
| C(11) | 237(3)   | 7025(3) | 2970(2) | 29(1)  |
| C(12) | -1022(3) | 7517(3) | 2329(2) | 29(1)  |
| C(13) | -1386(3) | 7057(3) | 1343(2) | 28(1)  |
| C(14) | -447(3)  | 6121(3) | 987(2)  | 38(1)  |
| C(15) | 817(4)   | 5648(3) | 1615(3) | 41(1)  |
| C(16) | 1161(3)  | 6083(3) | 2613(2) | 34(1)  |
| C(17) | 609(3)   | 7504(3) | 4075(2) | 28(1)  |
| O(17) | 1793(2)  | 6786(2) | 4616(2) | 38(1)  |
| C(18) | 1232(3)  | 8846(3) | 3753(2) | 35(1)  |
| F(1)  | 2585(2)  | 8897(2) | 3051(2) | 65(1)  |
| F(2)  | 199(2)   | 9630(2) | 3214(2) | 50(1)  |
| F(3)  | 1587(2)  | 9307(2) | 4690(2) | 52(1)  |
| C(19) | -925(3)  | 7419(3) | 4931(2) | 38(1)  |
| F(4)  | -1586(3) | 6301(2) | 5093(2) | 66(1)  |
| F(5)  | -602(2)  | 7646(2) | 5972(1) | 61(1)  |
| F(6)  | -2085(2) | 8215(2) | 4582(2) | 51(1)  |
| C(20) | -2777(3) | 7578(2) | 629(2)  | 28(1)  |
| O(20) | -3170(2) | 6741(2) | -78(2)  | 35(1)  |
| C(21) | -2227(3) | 8813(3) | -134(2) | 37(1)  |
| F(7)  | -1028(2) | 8618(2) | -918(2) | 57(1)  |
| F(8)  | -3427(2) | 9353(2) | -716(2) | 51(1)  |
| F(9)  | -1679(2) | 9627(2) | 467(2)  | 48(1)  |
| C(22) | -4306(3) | 7776(3) | 1436(2) | 33(1)  |
| F(10) | -5616(2) | 7939(2) | 844(2)  | 47(1)  |
| F(11) | -4190(2) | 8752(2) | 1965(2) | 43(1)  |

|       |          |         |         |       |
|-------|----------|---------|---------|-------|
| F(12) | -4603(2) | 6790(2) | 2265(2) | 47(1) |
|-------|----------|---------|---------|-------|

---

Table 3. Bond lengths [Å] and angles [°] for 1a.

---

|              |          |
|--------------|----------|
| N(1)-C(7)    | 1.435(4) |
| N(1)-C(5)    | 1.457(4) |
| N(1)-C(2)    | 1.465(5) |
| C(2)-C(3)    | 1.548(5) |
| C(2)-H(2A)   | 0.9900   |
| C(2)-H(2B)   | 0.9900   |
| C(3)-N(4)    | 1.464(4) |
| C(3)-H(3A)   | 0.9900   |
| C(3)-H(3B)   | 0.9900   |
| N(4)-C(8)    | 1.451(5) |
| N(4)-C(6)    | 1.465(4) |
| C(5)-C(6)    | 1.544(5) |
| C(5)-H(5A)   | 0.9900   |
| C(5)-H(5B)   | 0.9900   |
| C(6)-H(6A)   | 0.9900   |
| C(6)-H(6B)   | 0.9900   |
| C(7)-C(8)    | 1.552(5) |
| C(7)-H(7A)   | 0.9900   |
| C(7)-H(7B)   | 0.9900   |
| C(8)-H(8A)   | 0.9900   |
| C(8)-H(8B)   | 0.9900   |
| C(11)-C(16)  | 1.384(4) |
| C(11)-C(12)  | 1.393(4) |
| C(11)-C(17)  | 1.533(3) |
| C(12)-C(13)  | 1.392(3) |
| C(12)-H(12A) | 0.9500   |
| C(13)-C(14)  | 1.385(4) |
| C(13)-C(20)  | 1.536(3) |
| C(14)-C(15)  | 1.381(4) |
| C(14)-H(14A) | 0.9500   |
| C(15)-C(16)  | 1.387(4) |
| C(15)-H(15A) | 0.9500   |
| C(16)-H(16A) | 0.9500   |
| C(17)-O(17)  | 1.385(3) |
| C(17)-C(18)  | 1.539(4) |
| C(17)-C(19)  | 1.544(4) |

|              |            |
|--------------|------------|
| O(17)-H(17O) | 0.9800(11) |
| C(18)-F(1)   | 1.328(3)   |
| C(18)-F(2)   | 1.332(3)   |
| C(18)-F(3)   | 1.339(3)   |
| C(19)-F(4)   | 1.325(4)   |
| C(19)-F(5)   | 1.334(3)   |
| C(19)-F(6)   | 1.340(4)   |
| C(20)-O(20)  | 1.394(3)   |
| C(20)-C(21)  | 1.539(4)   |
| C(20)-C(22)  | 1.553(4)   |
| O(20)-H(20O) | 0.9800(11) |
| C(21)-F(9)   | 1.333(3)   |
| C(21)-F(8)   | 1.335(3)   |
| C(21)-F(7)   | 1.336(3)   |
| C(22)-F(11)  | 1.333(3)   |
| C(22)-F(12)  | 1.334(3)   |
| C(22)-F(10)  | 1.335(3)   |

|                  |          |
|------------------|----------|
| C(7)-N(1)-C(5)   | 108.9(4) |
| C(7)-N(1)-C(2)   | 109.0(4) |
| C(5)-N(1)-C(2)   | 106.0(3) |
| N(1)-C(2)-C(3)   | 110.8(3) |
| N(1)-C(2)-H(2A)  | 109.5    |
| C(3)-C(2)-H(2A)  | 109.5    |
| N(1)-C(2)-H(2B)  | 109.5    |
| C(3)-C(2)-H(2B)  | 109.5    |
| H(2A)-C(2)-H(2B) | 108.1    |
| N(4)-C(3)-C(2)   | 110.4(3) |
| N(4)-C(3)-H(3A)  | 109.6    |
| C(2)-C(3)-H(3A)  | 109.6    |
| N(4)-C(3)-H(3B)  | 109.6    |
| C(2)-C(3)-H(3B)  | 109.6    |
| H(3A)-C(3)-H(3B) | 108.1    |
| C(8)-N(4)-C(3)   | 109.3(3) |
| C(8)-N(4)-C(6)   | 108.5(3) |
| C(3)-N(4)-C(6)   | 107.2(3) |
| N(1)-C(5)-C(6)   | 111.4(3) |
| N(1)-C(5)-H(5A)  | 109.4    |



|                    |          |
|--------------------|----------|
| C(6)-C(5)-H(5A)    | 109.4    |
| N(1)-C(5)-H(5B)    | 109.4    |
| C(6)-C(5)-H(5B)    | 109.4    |
| H(5A)-C(5)-H(5B)   | 108.0    |
| N(4)-C(6)-C(5)     | 110.1(3) |
| N(4)-C(6)-H(6A)    | 109.6    |
| C(5)-C(6)-H(6A)    | 109.6    |
| N(4)-C(6)-H(6B)    | 109.6    |
| C(5)-C(6)-H(6B)    | 109.6    |
| H(6A)-C(6)-H(6B)   | 108.1    |
| N(1)-C(7)-C(8)     | 111.8(3) |
| N(1)-C(7)-H(7A)    | 109.3    |
| C(8)-C(7)-H(7A)    | 109.3    |
| N(1)-C(7)-H(7B)    | 109.3    |
| C(8)-C(7)-H(7B)    | 109.3    |
| H(7A)-C(7)-H(7B)   | 107.9    |
| N(4)-C(8)-C(7)     | 110.0(3) |
| N(4)-C(8)-H(8A)    | 109.7    |
| C(7)-C(8)-H(8A)    | 109.7    |
| N(4)-C(8)-H(8B)    | 109.7    |
| C(7)-C(8)-H(8B)    | 109.7    |
| H(8A)-C(8)-H(8B)   | 108.2    |
| C(16)-C(11)-C(12)  | 119.8(2) |
| C(16)-C(11)-C(17)  | 119.3(2) |
| C(12)-C(11)-C(17)  | 121.0(2) |
| C(13)-C(12)-C(11)  | 120.8(2) |
| C(13)-C(12)-H(12A) | 119.6    |
| C(11)-C(12)-H(12A) | 119.6    |
| C(14)-C(13)-C(12)  | 119.0(2) |
| C(14)-C(13)-C(20)  | 119.2(2) |
| C(12)-C(13)-C(20)  | 121.7(2) |
| C(15)-C(14)-C(13)  | 120.0(2) |
| C(15)-C(14)-H(14A) | 120.0    |
| C(13)-C(14)-H(14A) | 120.0    |
| C(14)-C(15)-C(16)  | 121.2(3) |
| C(14)-C(15)-H(15A) | 119.4    |
| C(16)-C(15)-H(15A) | 119.4    |
| C(11)-C(16)-C(15)  | 119.1(3) |

|                    |          |
|--------------------|----------|
| C(11)-C(16)-H(16A) | 120.4    |
| C(15)-C(16)-H(16A) | 120.4    |
| O(17)-C(17)-C(11)  | 109.8(2) |
| O(17)-C(17)-C(18)  | 108.6(2) |
| C(11)-C(17)-C(18)  | 109.5(2) |
| O(17)-C(17)-C(19)  | 108.2(2) |
| C(11)-C(17)-C(19)  | 109.9(2) |
| C(18)-C(17)-C(19)  | 110.7(2) |
| C(17)-O(17)-H(17O) | 118(2)   |
| F(1)-C(18)-F(2)    | 107.0(2) |
| F(1)-C(18)-F(3)    | 106.8(2) |
| F(2)-C(18)-F(3)    | 106.4(2) |
| F(1)-C(18)-C(17)   | 110.0(2) |
| F(2)-C(18)-C(17)   | 114.3(2) |
| F(3)-C(18)-C(17)   | 111.9(2) |
| F(4)-C(19)-F(5)    | 107.2(3) |
| F(4)-C(19)-F(6)    | 106.4(2) |
| F(5)-C(19)-F(6)    | 105.8(2) |
| F(4)-C(19)-C(17)   | 110.9(2) |
| F(5)-C(19)-C(17)   | 111.9(2) |
| F(6)-C(19)-C(17)   | 114.2(2) |
| O(20)-C(20)-C(13)  | 109.2(2) |
| O(20)-C(20)-C(21)  | 109.5(2) |
| C(13)-C(20)-C(21)  | 108.9(2) |
| O(20)-C(20)-C(22)  | 108.2(2) |
| C(13)-C(20)-C(22)  | 111.0(2) |
| C(21)-C(20)-C(22)  | 110.0(2) |
| C(20)-O(20)-H(20O) | 113(2)   |
| F(9)-C(21)-F(8)    | 107.2(2) |
| F(9)-C(21)-F(7)    | 107.0(2) |
| F(8)-C(21)-F(7)    | 107.5(2) |
| F(9)-C(21)-C(20)   | 113.4(2) |
| F(8)-C(21)-C(20)   | 111.6(2) |
| F(7)-C(21)-C(20)   | 109.9(2) |
| F(11)-C(22)-F(12)  | 107.3(2) |
| F(11)-C(22)-F(10)  | 107.0(2) |
| F(12)-C(22)-F(10)  | 106.7(2) |
| F(11)-C(22)-C(20)  | 113.4(2) |

F(12)-C(22)-C(20)            110.8(2)

F(10)-C(22)-C(20)            111.2(2)

---

Symmetry transformations used to generate equivalent atoms:

Table 4. Anisotropic displacement parameters ( $\text{\AA}^2 \times 10^3$ ) for 1a. The anisotropic displacement factor exponent takes the form:  $-2\pi^2 [ h^2 a^{*2}U^{11} + \dots + 2 h k a^* b^* U^{12} ]$

|       | U <sup>11</sup> | U <sup>22</sup> | U <sup>33</sup> | U <sup>23</sup> | U <sup>13</sup> | U <sup>12</sup> |
|-------|-----------------|-----------------|-----------------|-----------------|-----------------|-----------------|
| N(1)  | 32(1)           | 36(1)           | 31(1)           | -10(1)          | -9(1)           | 2(1)            |
| C(2)  | 74(3)           | 123(4)          | 49(2)           | 13(2)           | -27(2)          | -49(3)          |
| C(3)  | 67(2)           | 114(4)          | 43(2)           | 14(2)           | -23(2)          | -43(2)          |
| N(4)  | 31(1)           | 38(1)           | 31(1)           | -9(1)           | -7(1)           | 2(1)            |
| C(5)  | 41(2)           | 151(5)          | 43(2)           | -34(2)          | -13(2)          | 15(2)           |
| C(6)  | 42(2)           | 110(3)          | 43(2)           | -24(2)          | -15(1)          | 11(2)           |
| C(7)  | 156(5)          | 64(3)           | 119(4)          | -55(3)          | -113(4)         | 50(3)           |
| C(8)  | 120(4)          | 59(3)           | 93(3)           | -41(2)          | -78(3)          | 42(3)           |
| C(11) | 29(1)           | 31(2)           | 28(1)           | -8(1)           | -7(1)           | 1(1)            |
| C(12) | 30(1)           | 29(2)           | 32(1)           | -11(1)          | -8(1)           | 7(1)            |
| C(13) | 28(1)           | 32(2)           | 27(1)           | -10(1)          | -8(1)           | 4(1)            |
| C(14) | 41(2)           | 45(2)           | 35(2)           | -22(1)          | -13(1)          | 10(1)           |
| C(15) | 42(2)           | 43(2)           | 46(2)           | -23(1)          | -18(1)          | 19(1)           |
| C(16) | 31(1)           | 38(2)           | 37(2)           | -12(1)          | -15(1)          | 11(1)           |
| C(17) | 28(1)           | 32(2)           | 28(1)           | -9(1)           | -11(1)          | 5(1)            |
| O(17) | 43(1)           | 42(1)           | 35(1)           | -14(1)          | -21(1)          | 13(1)           |
| C(18) | 37(2)           | 37(2)           | 35(2)           | -12(1)          | -12(1)          | 1(1)            |
| F(1)  | 54(1)           | 59(1)           | 82(1)           | -24(1)          | 22(1)           | -19(1)          |
| F(2)  | 67(1)           | 38(1)           | 50(1)           | -5(1)           | -29(1)          | 2(1)            |
| F(3)  | 71(1)           | 42(1)           | 53(1)           | -22(1)          | -31(1)          | 4(1)            |
| C(19) | 38(2)           | 50(2)           | 28(1)           | -11(1)          | -9(1)           | 3(1)            |
| F(4)  | 74(1)           | 62(1)           | 57(1)           | -5(1)           | 13(1)           | -24(1)          |
| F(5)  | 47(1)           | 111(2)          | 30(1)           | -26(1)          | -9(1)           | 11(1)           |
| F(6)  | 34(1)           | 81(1)           | 41(1)           | -18(1)          | -7(1)           | 16(1)           |
| C(20) | 32(1)           | 30(2)           | 27(1)           | -11(1)          | -10(1)          | 3(1)            |
| O(20) | 42(1)           | 34(1)           | 37(1)           | -17(1)          | -20(1)          | 9(1)            |
| C(21) | 41(2)           | 37(2)           | 37(2)           | -10(1)          | -13(1)          | 4(1)            |
| F(7)  | 63(1)           | 61(1)           | 42(1)           | -2(1)           | 10(1)           | 0(1)            |
| F(8)  | 63(1)           | 38(1)           | 53(1)           | 2(1)            | -30(1)          | 4(1)            |
| F(9)  | 57(1)           | 38(1)           | 50(1)           | -7(1)           | -17(1)          | -12(1)          |
| C(22) | 31(1)           | 33(2)           | 38(2)           | -12(1)          | -13(1)          | 6(1)            |
| F(10) | 31(1)           | 65(1)           | 51(1)           | -23(1)          | -17(1)          | 11(1)           |
| F(11) | 37(1)           | 48(1)           | 52(1)           | -28(1)          | -10(1)          | 11(1)           |

|       |       |       |       |      |      |       |
|-------|-------|-------|-------|------|------|-------|
| F(12) | 43(1) | 47(1) | 48(1) | 0(1) | 0(1) | -2(1) |
|-------|-------|-------|-------|------|------|-------|

---

Table 5. Hydrogen coordinates ( $\times 10^4$ ) and isotropic displacement parameters ( $\text{\AA}^2 \times 10^3$ ) for 1a.

|        | x         | y        | z        | U(eq)  |
|--------|-----------|----------|----------|--------|
| H(2A)  | 6533      | 7956     | 7036     | 100    |
| H(2B)  | 5362      | 8961     | 7506     | 100    |
| H(3A)  | 3877      | 8964     | 6027     | 92     |
| H(3B)  | 5052      | 7963     | 5554     | 92     |
| H(5A)  | 3106      | 8373     | 8775     | 91     |
| H(5B)  | 2672      | 6947     | 9254     | 91     |
| H(6A)  | 1198      | 6890     | 7785     | 76     |
| H(6B)  | 1576      | 8330     | 7333     | 76     |
| H(7A)  | 4377      | 5385     | 8577     | 124    |
| H(7B)  | 5936      | 5793     | 7692     | 124    |
| H(8A)  | 4469      | 5782     | 6205     | 100    |
| H(8B)  | 2911      | 5366     | 7091     | 100    |
| H(12A) | -1640     | 8175     | 2567     | 35     |
| H(14A) | -671      | 5805     | 310      | 46     |
| H(15A) | 1462      | 5013     | 1358     | 49     |
| H(16A) | 2020      | 5739     | 3046     | 41     |
| H(17O) | 2150(50)  | 7000(40) | 5333(19) | 73(12) |
| H(20O) | -3950(30) | 7070(30) | -630(20) | 63(11) |

Table 6. Torsion angles [°] for 1a.

---

|                         |           |
|-------------------------|-----------|
| C(7)-N(1)-C(2)-C(3)     | 57.6(5)   |
| C(5)-N(1)-C(2)-C(3)     | -59.4(5)  |
| N(1)-C(2)-C(3)-N(4)     | -0.2(6)   |
| C(2)-C(3)-N(4)-C(8)     | -57.9(5)  |
| C(2)-C(3)-N(4)-C(6)     | 59.6(5)   |
| C(7)-N(1)-C(5)-C(6)     | -56.2(5)  |
| C(2)-N(1)-C(5)-C(6)     | 60.9(5)   |
| C(8)-N(4)-C(6)-C(5)     | 59.6(4)   |
| C(3)-N(4)-C(6)-C(5)     | -58.3(4)  |
| N(1)-C(5)-C(6)-N(4)     | -2.1(5)   |
| C(5)-N(1)-C(7)-C(8)     | 57.7(6)   |
| C(2)-N(1)-C(7)-C(8)     | -57.5(6)  |
| C(3)-N(4)-C(8)-C(7)     | 58.3(5)   |
| C(6)-N(4)-C(8)-C(7)     | -58.4(5)  |
| N(1)-C(7)-C(8)-N(4)     | -0.3(7)   |
| C(16)-C(11)-C(12)-C(13) | 1.3(4)    |
| C(17)-C(11)-C(12)-C(13) | -178.2(2) |
| C(11)-C(12)-C(13)-C(14) | -1.8(4)   |
| C(11)-C(12)-C(13)-C(20) | 179.5(2)  |
| C(12)-C(13)-C(14)-C(15) | 0.8(4)    |
| C(20)-C(13)-C(14)-C(15) | 179.6(3)  |
| C(13)-C(14)-C(15)-C(16) | 0.7(5)    |
| C(12)-C(11)-C(16)-C(15) | 0.3(4)    |
| C(17)-C(11)-C(16)-C(15) | 179.7(3)  |
| C(14)-C(15)-C(16)-C(11) | -1.3(5)   |
| C(16)-C(11)-C(17)-O(17) | -5.6(3)   |
| C(12)-C(11)-C(17)-O(17) | 173.8(2)  |
| C(16)-C(11)-C(17)-C(18) | 113.6(3)  |
| C(12)-C(11)-C(17)-C(18) | -66.9(3)  |
| C(16)-C(11)-C(17)-C(19) | -124.6(3) |
| C(12)-C(11)-C(17)-C(19) | 54.9(3)   |
| O(17)-C(17)-C(18)-F(1)  | 58.9(3)   |
| C(11)-C(17)-C(18)-F(1)  | -61.0(3)  |
| C(19)-C(17)-C(18)-F(1)  | 177.7(2)  |
| O(17)-C(17)-C(18)-F(2)  | 179.4(2)  |
| C(11)-C(17)-C(18)-F(2)  | 59.4(3)   |

|                         |           |
|-------------------------|-----------|
| C(19)-C(17)-C(18)-F(2)  | -61.9(3)  |
| O(17)-C(17)-C(18)-F(3)  | -59.6(3)  |
| C(11)-C(17)-C(18)-F(3)  | -179.5(2) |
| C(19)-C(17)-C(18)-F(3)  | 59.2(3)   |
| O(17)-C(17)-C(19)-F(4)  | -69.2(3)  |
| C(11)-C(17)-C(19)-F(4)  | 50.7(3)   |
| C(18)-C(17)-C(19)-F(4)  | 171.8(2)  |
| O(17)-C(17)-C(19)-F(5)  | 50.5(3)   |
| C(11)-C(17)-C(19)-F(5)  | 170.4(2)  |
| C(18)-C(17)-C(19)-F(5)  | -68.5(3)  |
| O(17)-C(17)-C(19)-F(6)  | 170.6(2)  |
| C(11)-C(17)-C(19)-F(6)  | -69.5(3)  |
| C(18)-C(17)-C(19)-F(6)  | 51.6(3)   |
| C(14)-C(13)-C(20)-O(20) | 18.4(3)   |
| C(12)-C(13)-C(20)-O(20) | -162.8(2) |
| C(14)-C(13)-C(20)-C(21) | -101.1(3) |
| C(12)-C(13)-C(20)-C(21) | 77.6(3)   |
| C(14)-C(13)-C(20)-C(22) | 137.6(3)  |
| C(12)-C(13)-C(20)-C(22) | -43.6(3)  |
| O(20)-C(20)-C(21)-F(9)  | -173.9(2) |
| C(13)-C(20)-C(21)-F(9)  | -54.5(3)  |
| C(22)-C(20)-C(21)-F(9)  | 67.3(3)   |
| O(20)-C(20)-C(21)-F(8)  | 65.0(3)   |
| C(13)-C(20)-C(21)-F(8)  | -175.7(2) |
| C(22)-C(20)-C(21)-F(8)  | -53.8(3)  |
| O(20)-C(20)-C(21)-F(7)  | -54.1(3)  |
| C(13)-C(20)-C(21)-F(7)  | 65.2(3)   |
| C(22)-C(20)-C(21)-F(7)  | -173.0(2) |
| O(20)-C(20)-C(22)-F(11) | -165.9(2) |
| C(13)-C(20)-C(22)-F(11) | 74.3(3)   |
| C(21)-C(20)-C(22)-F(11) | -46.3(3)  |
| O(20)-C(20)-C(22)-F(12) | 73.3(3)   |
| C(13)-C(20)-C(22)-F(12) | -46.4(3)  |
| C(21)-C(20)-C(22)-F(12) | -167.0(2) |
| O(20)-C(20)-C(22)-F(10) | -45.2(3)  |
| C(13)-C(20)-C(22)-F(10) | -165.0(2) |
| C(21)-C(20)-C(22)-F(10) | 74.4(3)   |



Symmetry transformations used to generate equivalent atoms:

Table 7. Hydrogen bonds for 1a [ $\text{\AA}$  and  $^\circ$ ].

| D-H...A               | d(D-H)     | d(H...A)  | d(D...A) | $\angle(\text{DHA})$ |
|-----------------------|------------|-----------|----------|----------------------|
| O(17)-H(17O)...N(4)   | 0.9800(11) | 1.708(8)  | 2.678(3) | 169(4)               |
| O(20)-H(20O)...N(1)#1 | 0.9800(11) | 1.712(12) | 2.662(3) | 162(4)               |

Symmetry transformations used to generate equivalent atoms:

#1 x-1,y,z-1

## X-ray diffraction data for 1b

Table 1. Crystal data and structure refinement for 1b.

|                                   |                                                                               |                 |
|-----------------------------------|-------------------------------------------------------------------------------|-----------------|
| Identification code               | 1b                                                                            |                 |
| Empirical formula                 | C <sub>18</sub> H <sub>18</sub> F <sub>12</sub> N <sub>2</sub> O <sub>2</sub> |                 |
| Formula weight                    | 522.34                                                                        |                 |
| Temperature                       | 173(2) K                                                                      |                 |
| Wavelength                        | 1.54178 Å                                                                     |                 |
| Crystal system                    | Monoclinic                                                                    |                 |
| Space group                       | Cc                                                                            |                 |
| Unit cell dimensions              | a = 25.06(2) Å                                                                | α = 90°.        |
|                                   | b = 6.782(5) Å                                                                | β = 110.81(3)°. |
|                                   | c = 13.057(15) Å                                                              | γ = 90°.        |
| Volume                            | 2075(3) Å <sup>3</sup>                                                        |                 |
| Z                                 | 4                                                                             |                 |
| Density (calculated)              | 1.672 Mg/m <sup>3</sup>                                                       |                 |
| Absorption coefficient            | 1.650 mm <sup>-1</sup>                                                        |                 |
| F(000)                            | 1056                                                                          |                 |
| Crystal size                      | 0.12 x 0.10 x 0.05 mm <sup>3</sup>                                            |                 |
| Theta range for data collection   | 3.77 to 67.84°.                                                               |                 |
| Index ranges                      | -30 ≤ h ≤ 30, -8 ≤ k ≤ 8, -15 ≤ l ≤ 15                                        |                 |
| Reflections collected             | 12652                                                                         |                 |
| Independent reflections           | 3574 [R(int) = 0.1548]                                                        |                 |
| Completeness to theta = 67.00°    | 99.0 %                                                                        |                 |
| Absorption correction             | Multiscan                                                                     |                 |
| Max. and min. transmission        | 1.000 and 0.643                                                               |                 |
| Refinement method                 | Full-matrix least-squares on F <sup>2</sup>                                   |                 |
| Data / restraints / parameters    | 3574 / 4 / 316                                                                |                 |
| Goodness-of-fit on F <sup>2</sup> | 1.330                                                                         |                 |
| Final R indices [I > 2σ(I)]       | R1 = 0.1324, wR2 = 0.3253                                                     |                 |
| R indices (all data)              | R1 = 0.1404, wR2 = 0.3567                                                     |                 |
| Absolute structure parameter      | 0.6(3)                                                                        |                 |
| Extinction coefficient            | 0.014(2)                                                                      |                 |
| Largest diff. peak and hole       | 0.826 and -0.594 e.Å <sup>-3</sup>                                            |                 |

Table 2. Atomic coordinates ( $\times 10^4$ ) and equivalent isotropic displacement parameters ( $\text{\AA}^2 \times 10^3$ ) for 1b.  $U(\text{eq})$  is defined as one third of the trace of the orthogonalized  $U^{ij}$  tensor.

|       | x       | y        | z        | U(eq)  |
|-------|---------|----------|----------|--------|
| N(1)  | 5091(2) | 4088(9)  | 10467(5) | 68(1)  |
| C(2)  | 5387(4) | 2583(11) | 11265(6) | 80(2)  |
| C(3)  | 5855(4) | 3631(12) | 12223(6) | 81(2)  |
| N(4)  | 5876(2) | 5727(8)  | 12040(5) | 69(1)  |
| C(5)  | 5496(3) | 5063(12) | 10072(6) | 79(2)  |
| C(6)  | 5970(4) | 6067(14) | 11003(6) | 85(2)  |
| C(7)  | 4840(3) | 5565(13) | 10981(6) | 80(2)  |
| C(8)  | 5312(3) | 6551(12) | 11923(6) | 81(2)  |
| C(11) | 3454(3) | 1982(11) | 7220(5)  | 68(1)  |
| C(12) | 3083(3) | 478(11)  | 6673(6)  | 76(2)  |
| C(13) | 2619(3) | 876(10)  | 5727(6)  | 69(2)  |
| C(14) | 2516(2) | 2740(10) | 5308(5)  | 64(1)  |
| C(15) | 2891(3) | 4288(11) | 5853(6)  | 75(2)  |
| C(16) | 3352(3) | 3854(11) | 6794(6)  | 77(2)  |
| C(17) | 3962(3) | 1629(10) | 8297(5)  | 68(2)  |
| O(17) | 4302(2) | 3304(8)  | 8545(4)  | 84(1)  |
| C(18) | 4327(3) | -40(13)  | 8162(7)  | 87(2)  |
| F(1)  | 4465(3) | 264(16)  | 7272(5)  | 150(3) |
| F(2)  | 4829(2) | -154(8)  | 9012(5)  | 100(2) |
| F(3)  | 4102(4) | -1802(9) | 8095(9)  | 184(5) |
| C(19) | 3742(3) | 1190(20) | 9199(7)  | 103(3) |
| F(4)  | 4163(2) | 786(11)  | 10155(4) | 109(2) |
| F(5)  | 3386(4) | -170(20) | 9028(5)  | 242(8) |
| F(6)  | 3496(3) | 2780(20) | 9422(6)  | 184(5) |
| C(20) | 1995(2) | 3132(9)  | 4287(5)  | 62(1)  |
| O(20) | 1709(2) | 1381(7)  | 3944(4)  | 83(1)  |
| C(21) | 1587(3) | 4478(12) | 4579(6)  | 75(2)  |
| F(7)  | 1471(2) | 3769(10) | 5425(4)  | 105(2) |
| F(8)  | 1078(2) | 4638(8)  | 3750(4)  | 89(1)  |
| F(9)  | 1766(2) | 6312(8)  | 4829(5)  | 104(2) |
| C(22) | 2167(4) | 4029(13) | 3388(6)  | 81(2)  |
| F(10) | 2405(3) | 5839(10) | 3618(4)  | 112(2) |
| F(11) | 1711(2) | 4315(7)  | 2468(4)  | 88(1)  |

|       |         |          |         |        |
|-------|---------|----------|---------|--------|
| F(12) | 2502(4) | 2834(15) | 3116(6) | 149(3) |
|-------|---------|----------|---------|--------|

---

Table 3. Bond lengths [Å] and angles [°] for 1b.

---

|              |           |
|--------------|-----------|
| N(1)-C(5)    | 1.451(10) |
| N(1)-C(2)    | 1.459(10) |
| N(1)-C(7)    | 1.466(10) |
| C(2)-C(3)    | 1.550(10) |
| C(2)-H(2A)   | 0.9900    |
| C(2)-H(2B)   | 0.9900    |
| C(3)-N(4)    | 1.446(10) |
| C(3)-H(3A)   | 0.9900    |
| C(3)-H(3B)   | 0.9900    |
| N(4)-C(6)    | 1.474(10) |
| N(4)-C(8)    | 1.476(10) |
| C(5)-C(6)    | 1.525(11) |
| C(5)-H(5A)   | 0.9900    |
| C(5)-H(5B)   | 0.9900    |
| C(6)-H(6A)   | 0.9900    |
| C(6)-H(6B)   | 0.9900    |
| C(7)-C(8)    | 1.525(11) |
| C(7)-H(7A)   | 0.9900    |
| C(7)-H(7B)   | 0.9900    |
| C(8)-H(8A)   | 0.9900    |
| C(8)-H(8B)   | 0.9900    |
| C(11)-C(16)  | 1.373(11) |
| C(11)-C(12)  | 1.393(11) |
| C(11)-C(17)  | 1.544(10) |
| C(12)-C(13)  | 1.390(10) |
| C(12)-H(12A) | 0.9500    |
| C(13)-C(14)  | 1.365(10) |
| C(13)-H(13A) | 0.9500    |
| C(14)-C(15)  | 1.420(9)  |
| C(14)-C(20)  | 1.522(8)  |
| C(15)-C(16)  | 1.388(10) |
| C(15)-H(15A) | 0.9500    |
| C(16)-H(16A) | 0.9500    |
| C(17)-O(17)  | 1.388(8)  |
| C(17)-C(19)  | 1.496(10) |
| C(17)-C(18)  | 1.504(11) |

|                  |           |
|------------------|-----------|
| O(17)-H(17O)     | 0.98(2)   |
| C(18)-F(3)       | 1.312(12) |
| C(18)-F(1)       | 1.341(12) |
| C(18)-F(2)       | 1.352(9)  |
| C(19)-F(5)       | 1.247(13) |
| C(19)-F(6)       | 1.325(16) |
| C(19)-F(4)       | 1.345(10) |
| C(20)-O(20)      | 1.377(8)  |
| C(20)-C(22)      | 1.515(10) |
| C(20)-C(21)      | 1.517(10) |
| O(20)-H(20O)     | 0.98(2)   |
| C(21)-F(9)       | 1.324(9)  |
| C(21)-F(7)       | 1.328(9)  |
| C(21)-F(8)       | 1.353(9)  |
| C(22)-F(12)      | 1.303(12) |
| C(22)-F(11)      | 1.347(9)  |
| C(22)-F(10)      | 1.351(11) |
|                  |           |
| C(5)-N(1)-C(2)   | 109.3(6)  |
| C(5)-N(1)-C(7)   | 108.6(6)  |
| C(2)-N(1)-C(7)   | 110.1(6)  |
| N(1)-C(2)-C(3)   | 107.6(6)  |
| N(1)-C(2)-H(2A)  | 110.2     |
| C(3)-C(2)-H(2A)  | 110.2     |
| N(1)-C(2)-H(2B)  | 110.2     |
| C(3)-C(2)-H(2B)  | 110.2     |
| H(2A)-C(2)-H(2B) | 108.5     |
| N(4)-C(3)-C(2)   | 112.3(6)  |
| N(4)-C(3)-H(3A)  | 109.1     |
| C(2)-C(3)-H(3A)  | 109.1     |
| N(4)-C(3)-H(3B)  | 109.1     |
| C(2)-C(3)-H(3B)  | 109.1     |
| H(3A)-C(3)-H(3B) | 107.9     |
| C(3)-N(4)-C(6)   | 109.4(6)  |
| C(3)-N(4)-C(8)   | 107.5(6)  |
| C(6)-N(4)-C(8)   | 107.8(6)  |
| N(1)-C(5)-C(6)   | 111.4(6)  |
| N(1)-C(5)-H(5A)  | 109.3     |

|                    |          |
|--------------------|----------|
| C(6)-C(5)-H(5A)    | 109.3    |
| N(1)-C(5)-H(5B)    | 109.3    |
| C(6)-C(5)-H(5B)    | 109.3    |
| H(5A)-C(5)-H(5B)   | 108.0    |
| N(4)-C(6)-C(5)     | 109.2(6) |
| N(4)-C(6)-H(6A)    | 109.8    |
| C(5)-C(6)-H(6A)    | 109.8    |
| N(4)-C(6)-H(6B)    | 109.8    |
| C(5)-C(6)-H(6B)    | 109.8    |
| H(6A)-C(6)-H(6B)   | 108.3    |
| N(1)-C(7)-C(8)     | 109.5(6) |
| N(1)-C(7)-H(7A)    | 109.8    |
| C(8)-C(7)-H(7A)    | 109.8    |
| N(1)-C(7)-H(7B)    | 109.8    |
| C(8)-C(7)-H(7B)    | 109.8    |
| H(7A)-C(7)-H(7B)   | 108.2    |
| N(4)-C(8)-C(7)     | 110.9(6) |
| N(4)-C(8)-H(8A)    | 109.5    |
| C(7)-C(8)-H(8A)    | 109.5    |
| N(4)-C(8)-H(8B)    | 109.5    |
| C(7)-C(8)-H(8B)    | 109.5    |
| H(8A)-C(8)-H(8B)   | 108.0    |
| C(16)-C(11)-C(12)  | 118.4(7) |
| C(16)-C(11)-C(17)  | 119.1(6) |
| C(12)-C(11)-C(17)  | 122.5(6) |
| C(13)-C(12)-C(11)  | 120.6(7) |
| C(13)-C(12)-H(12A) | 119.7    |
| C(11)-C(12)-H(12A) | 119.7    |
| C(14)-C(13)-C(12)  | 121.0(6) |
| C(14)-C(13)-H(13A) | 119.5    |
| C(12)-C(13)-H(13A) | 119.5    |
| C(13)-C(14)-C(15)  | 119.1(6) |
| C(13)-C(14)-C(20)  | 119.6(5) |
| C(15)-C(14)-C(20)  | 121.3(6) |
| C(16)-C(15)-C(14)  | 118.8(7) |
| C(16)-C(15)-H(15A) | 120.6    |
| C(14)-C(15)-H(15A) | 120.6    |
| C(11)-C(16)-C(15)  | 122.1(7) |



|                    |           |
|--------------------|-----------|
| C(11)-C(16)-H(16A) | 119.0     |
| C(15)-C(16)-H(16A) | 119.0     |
| O(17)-C(17)-C(19)  | 110.3(7)  |
| O(17)-C(17)-C(18)  | 107.1(6)  |
| C(19)-C(17)-C(18)  | 110.5(8)  |
| O(17)-C(17)-C(11)  | 109.0(6)  |
| C(19)-C(17)-C(11)  | 109.4(6)  |
| C(18)-C(17)-C(11)  | 110.5(5)  |
| C(17)-O(17)-H(17O) | 123(5)    |
| F(3)-C(18)-F(1)    | 108.6(9)  |
| F(3)-C(18)-F(2)    | 104.8(7)  |
| F(1)-C(18)-F(2)    | 105.6(7)  |
| F(3)-C(18)-C(17)   | 115.3(8)  |
| F(1)-C(18)-C(17)   | 109.9(8)  |
| F(2)-C(18)-C(17)   | 112.0(6)  |
| F(5)-C(19)-F(6)    | 106.2(11) |
| F(5)-C(19)-F(4)    | 107.0(9)  |
| F(6)-C(19)-F(4)    | 103.5(8)  |
| F(5)-C(19)-C(17)   | 116.6(8)  |
| F(6)-C(19)-C(17)   | 110.0(9)  |
| F(4)-C(19)-C(17)   | 112.6(6)  |
| O(20)-C(20)-C(22)  | 110.6(6)  |
| O(20)-C(20)-C(21)  | 106.3(5)  |
| C(22)-C(20)-C(21)  | 110.9(6)  |
| O(20)-C(20)-C(14)  | 108.6(5)  |
| C(22)-C(20)-C(14)  | 111.0(5)  |
| C(21)-C(20)-C(14)  | 109.2(6)  |
| C(20)-O(20)-H(20O) | 136(7)    |
| F(9)-C(21)-F(7)    | 106.8(7)  |
| F(9)-C(21)-F(8)    | 105.3(7)  |
| F(7)-C(21)-F(8)    | 105.8(6)  |
| F(9)-C(21)-C(20)   | 115.3(6)  |
| F(7)-C(21)-C(20)   | 110.9(6)  |
| F(8)-C(21)-C(20)   | 112.1(6)  |
| F(12)-C(22)-F(11)  | 105.8(7)  |
| F(12)-C(22)-F(10)  | 110.5(8)  |
| F(11)-C(22)-F(10)  | 103.6(6)  |
| F(12)-C(22)-C(20)  | 110.4(7)  |

F(11)-C(22)-C(20)            111.3(6)

F(10)-C(22)-C(20)            114.6(6)

---

Symmetry transformations used to generate equivalent atoms:

Table 4. Anisotropic displacement parameters ( $\text{\AA}^2 \times 10^3$ ) for 1b. The anisotropic displacement factor exponent takes the form:  $-2\pi^2 [ h^2 a^{*2}U^{11} + \dots + 2 h k a^* b^* U^{12} ]$

|       | U <sup>11</sup> | U <sup>22</sup> | U <sup>33</sup> | U <sup>23</sup> | U <sup>13</sup> | U <sup>12</sup> |
|-------|-----------------|-----------------|-----------------|-----------------|-----------------|-----------------|
| N(1)  | 61(3)           | 81(3)           | 53(3)           | -1(2)           | 7(2)            | -5(2)           |
| C(2)  | 73(3)           | 78(4)           | 69(4)           | 3(3)            | 1(3)            | -5(3)           |
| C(3)  | 75(4)           | 91(4)           | 57(4)           | -6(3)           | -3(3)           | -10(3)          |
| N(4)  | 68(3)           | 75(3)           | 54(3)           | -3(2)           | 10(2)           | -4(2)           |
| C(5)  | 80(4)           | 96(4)           | 51(4)           | -3(3)           | 13(3)           | -16(4)          |
| C(6)  | 86(5)           | 114(6)          | 50(4)           | -2(3)           | 16(4)           | -20(4)          |
| C(7)  | 61(3)           | 109(5)          | 56(4)           | -2(3)           | 1(3)            | 7(3)            |
| C(8)  | 74(4)           | 92(4)           | 63(4)           | -7(3)           | 9(3)            | 6(3)            |
| C(11) | 62(3)           | 82(4)           | 51(3)           | 0(3)            | 9(3)            | 2(3)            |
| C(12) | 68(4)           | 81(4)           | 62(4)           | -2(3)           | 4(3)            | -9(3)           |
| C(13) | 61(3)           | 78(3)           | 57(4)           | -6(3)           | 7(3)            | -4(3)           |
| C(14) | 54(3)           | 75(3)           | 49(3)           | -3(2)           | 0(2)            | -6(3)           |
| C(15) | 66(4)           | 74(4)           | 70(4)           | -6(3)           | 7(3)            | -12(3)          |
| C(16) | 68(4)           | 91(4)           | 57(4)           | 0(3)            | 4(3)            | -6(3)           |
| C(17) | 68(4)           | 76(3)           | 53(3)           | -8(3)           | 12(3)           | -7(3)           |
| O(17) | 76(3)           | 89(3)           | 59(3)           | 8(2)            | -9(2)           | -15(3)          |
| C(18) | 72(4)           | 96(5)           | 63(4)           | -20(3)          | -12(3)          | 6(4)            |
| F(1)  | 105(4)          | 259(9)          | 71(4)           | -35(4)          | 15(3)           | 52(5)           |
| F(2)  | 72(3)           | 110(3)          | 91(4)           | -15(2)          | -4(3)           | 16(2)           |
| F(3)  | 138(6)          | 83(3)           | 226(10)         | -27(5)          | -64(6)          | 10(3)           |
| C(19) | 61(4)           | 196(11)         | 47(4)           | 5(5)            | 13(3)           | -13(5)          |
| F(4)  | 84(3)           | 172(5)          | 56(3)           | 15(3)           | 6(2)            | -30(3)          |
| F(5)  | 167(8)          | 480(20)         | 50(3)           | 15(6)           | 9(4)            | -203(12)        |
| F(6)  | 129(6)          | 340(15)         | 77(4)           | -5(6)           | 31(4)           | 95(8)           |
| C(20) | 56(3)           | 67(3)           | 52(3)           | -1(2)           | 4(3)            | -4(2)           |
| O(20) | 84(3)           | 75(3)           | 69(3)           | -6(2)           | 1(3)            | -7(2)           |
| C(21) | 66(4)           | 90(4)           | 60(4)           | -4(3)           | 11(3)           | -6(3)           |
| F(7)  | 89(3)           | 160(5)          | 68(3)           | 10(3)           | 32(2)           | 0(3)            |
| F(8)  | 70(3)           | 108(3)          | 73(3)           | -4(2)           | 7(2)            | 7(2)            |
| F(9)  | 85(3)           | 93(3)           | 118(4)          | -28(3)          | 16(3)           | 3(2)            |
| C(22) | 76(4)           | 104(5)          | 51(3)           | 7(3)            | 9(3)            | 1(4)            |
| F(10) | 107(4)          | 144(4)          | 73(3)           | 8(3)            | 17(3)           | -49(3)          |
| F(11) | 85(3)           | 105(3)          | 56(2)           | 9(2)            | 4(2)            | -12(2)          |

F(12) 148(6) 220(9) 97(4) 39(5) 65(4) 83(6)

---

Table 5. Hydrogen coordinates ( $\times 10^4$ ) and isotropic displacement parameters ( $\text{\AA}^2 \times 10^3$ ) for 1b.

|        | x        | y         | z        | U(eq)   |
|--------|----------|-----------|----------|---------|
| H(2A)  | 5562     | 1594      | 10923    | 96      |
| H(2B)  | 5115     | 1898      | 11539    | 96      |
| H(3A)  | 5781     | 3408      | 12909    | 98      |
| H(3B)  | 6231     | 3043      | 12314    | 98      |
| H(5A)  | 5293     | 6058      | 9515     | 95      |
| H(5B)  | 5666     | 4080      | 9717     | 95      |
| H(6A)  | 6345     | 5525      | 11053    | 103     |
| H(6B)  | 5970     | 7500      | 10858    | 103     |
| H(7A)  | 4564     | 4925      | 11260    | 97      |
| H(7B)  | 4634     | 6568      | 10433    | 97      |
| H(8A)  | 5311     | 7987      | 11786    | 97      |
| H(8B)  | 5239     | 6351      | 12613    | 97      |
| H(12A) | 3149     | -831      | 6948     | 91      |
| H(13A) | 2369     | -165      | 5366     | 83      |
| H(15A) | 2826     | 5597      | 5579     | 90      |
| H(16A) | 3607     | 4884      | 7155     | 92      |
| H(17O) | 4600(30) | 3510(130) | 9260(40) | 90(30)  |
| H(20O) | 1360(30) | 970(170)  | 3340(70) | 120(40) |

Table 6. Torsion angles [°] for 1b.

---

|                         |           |
|-------------------------|-----------|
| C(5)-N(1)-C(2)-C(3)     | 60.2(8)   |
| C(7)-N(1)-C(2)-C(3)     | -59.0(8)  |
| N(1)-C(2)-C(3)-N(4)     | -1.7(10)  |
| C(2)-C(3)-N(4)-C(6)     | -57.2(9)  |
| C(2)-C(3)-N(4)-C(8)     | 59.6(9)   |
| C(2)-N(1)-C(5)-C(6)     | -60.6(9)  |
| C(7)-N(1)-C(5)-C(6)     | 59.5(9)   |
| C(3)-N(4)-C(6)-C(5)     | 57.4(9)   |
| C(8)-N(4)-C(6)-C(5)     | -59.3(9)  |
| N(1)-C(5)-C(6)-N(4)     | 0.5(10)   |
| C(5)-N(1)-C(7)-C(8)     | -59.1(8)  |
| C(2)-N(1)-C(7)-C(8)     | 60.5(9)   |
| C(3)-N(4)-C(8)-C(7)     | -58.3(8)  |
| C(6)-N(4)-C(8)-C(7)     | 59.6(9)   |
| N(1)-C(7)-C(8)-N(4)     | -0.2(9)   |
| C(16)-C(11)-C(12)-C(13) | -0.9(10)  |
| C(17)-C(11)-C(12)-C(13) | 177.6(6)  |
| C(11)-C(12)-C(13)-C(14) | 0.4(11)   |
| C(12)-C(13)-C(14)-C(15) | -0.1(10)  |
| C(12)-C(13)-C(14)-C(20) | -178.6(6) |
| C(13)-C(14)-C(15)-C(16) | 0.3(10)   |
| C(20)-C(14)-C(15)-C(16) | 178.7(6)  |
| C(12)-C(11)-C(16)-C(15) | 1.1(11)   |
| C(17)-C(11)-C(16)-C(15) | -177.5(6) |
| C(14)-C(15)-C(16)-C(11) | -0.8(11)  |
| C(16)-C(11)-C(17)-O(17) | -11.1(9)  |
| C(12)-C(11)-C(17)-O(17) | 170.4(6)  |
| C(16)-C(11)-C(17)-C(19) | 109.5(9)  |
| C(12)-C(11)-C(17)-C(19) | -69.0(9)  |
| C(16)-C(11)-C(17)-C(18) | -128.6(8) |
| C(12)-C(11)-C(17)-C(18) | 52.9(9)   |
| O(17)-C(17)-C(18)-F(3)  | 169.7(8)  |
| C(19)-C(17)-C(18)-F(3)  | 49.5(10)  |
| C(11)-C(17)-C(18)-F(3)  | -71.7(10) |
| O(17)-C(17)-C(18)-F(1)  | -67.1(8)  |
| C(19)-C(17)-C(18)-F(1)  | 172.7(7)  |

|                         |           |
|-------------------------|-----------|
| C(11)-C(17)-C(18)-F(1)  | 51.5(8)   |
| O(17)-C(17)-C(18)-F(2)  | 49.9(9)   |
| C(19)-C(17)-C(18)-F(2)  | -70.3(9)  |
| C(11)-C(17)-C(18)-F(2)  | 168.5(6)  |
| O(17)-C(17)-C(19)-F(5)  | 173.2(12) |
| C(18)-C(17)-C(19)-F(5)  | -68.5(13) |
| C(11)-C(17)-C(19)-F(5)  | 53.3(14)  |
| O(17)-C(17)-C(19)-F(6)  | 52.2(9)   |
| C(18)-C(17)-C(19)-F(6)  | 170.5(7)  |
| C(11)-C(17)-C(19)-F(6)  | -67.6(9)  |
| O(17)-C(17)-C(19)-F(4)  | -62.6(11) |
| C(18)-C(17)-C(19)-F(4)  | 55.7(11)  |
| C(11)-C(17)-C(19)-F(4)  | 177.5(8)  |
| C(13)-C(14)-C(20)-O(20) | -0.9(8)   |
| C(15)-C(14)-C(20)-O(20) | -179.4(6) |
| C(13)-C(14)-C(20)-C(22) | -122.8(7) |
| C(15)-C(14)-C(20)-C(22) | 58.7(8)   |
| C(13)-C(14)-C(20)-C(21) | 114.7(7)  |
| C(15)-C(14)-C(20)-C(21) | -63.8(7)  |
| O(20)-C(20)-C(21)-F(9)  | -173.8(6) |
| C(22)-C(20)-C(21)-F(9)  | -53.4(9)  |
| C(14)-C(20)-C(21)-F(9)  | 69.2(8)   |
| O(20)-C(20)-C(21)-F(7)  | 64.7(7)   |
| C(22)-C(20)-C(21)-F(7)  | -175.0(6) |
| C(14)-C(20)-C(21)-F(7)  | -52.4(7)  |
| O(20)-C(20)-C(21)-F(8)  | -53.3(7)  |
| C(22)-C(20)-C(21)-F(8)  | 67.0(7)   |
| C(14)-C(20)-C(21)-F(8)  | -170.4(5) |
| O(20)-C(20)-C(22)-F(12) | -60.1(9)  |
| C(21)-C(20)-C(22)-F(12) | -177.8(7) |
| C(14)-C(20)-C(22)-F(12) | 60.6(9)   |
| O(20)-C(20)-C(22)-F(11) | 57.1(8)   |
| C(21)-C(20)-C(22)-F(11) | -60.6(8)  |
| C(14)-C(20)-C(22)-F(11) | 177.8(6)  |
| O(20)-C(20)-C(22)-F(10) | 174.3(7)  |
| C(21)-C(20)-C(22)-F(10) | 56.6(9)   |
| C(14)-C(20)-C(22)-F(10) | -65.0(9)  |

Symmetry transformations used to generate equivalent atoms:



Table 7. Hydrogen bonds for 1b [ $\text{\AA}$  and  $^\circ$ ].

| D-H...A               | d(D-H)  | d(H...A) | d(D...A) | $\angle$ (DHA) |
|-----------------------|---------|----------|----------|----------------|
| O(17)-H(17O)...N(1)   | 0.98(2) | 1.66(2)  | 2.639(8) | 174(8)         |
| O(20)-H(20O)...N(4)#1 | 0.98(2) | 1.71(5)  | 2.655(7) | 160(11)        |

Symmetry transformations used to generate equivalent atoms:

#1  $x-1/2, y-1/2, z-1$
